# Supplementary material
Source: HighWire-hosted journal article supplement (https://openheart.bmj.com/content/12/1/e003008)
Supplement: inline-supplementary-material-1 [file inline-supplementary-material-1.pdf]

|    |                                                                                        |
|----|----------------------------------------------------------------------------------------|
| 1  | <b>Supplemental Appendix</b>                                                           |
| 2  |                                                                                        |
| 3  | <b>The role and prognostic value of growth differentiation factor 15 in patient of</b> |
| 4  | <b>heart failure with preserved ejection fraction: Insights from the PURSUIT-HFpEF</b> |
| 5  | <b>Registry</b>                                                                        |
| 6  |                                                                                        |
| 7  | • <b>Supplemental Figure</b>                                                           |
| 8  | • <b>Supplemental Table</b>                                                            |
| 9  | • <b>Collaborators list</b>                                                            |
| 10 |                                                                                        |

1     **Supplemental Figure 1. Distribution of GDF15**

2  
3

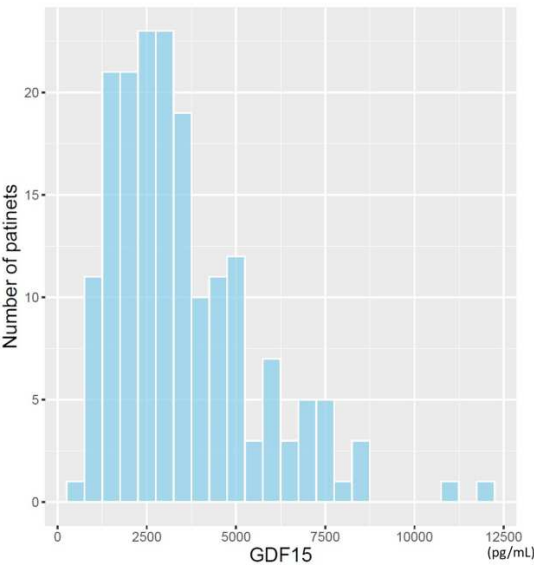

4  
5  
6  
7  
8  
9

6     The distribution of GDF15 is shown using a histogram. In the histogram, the x-axis

7     shows GDF15 level, and the y-axis shows the number of patients. Abbreviations:

8     GDF15, growth differentiation factor 15.

1    **Supplemental Table 1. Comparison of background of patients included and those**  
2    **not included for analysis of GDF15**

3

| Characteristic                       | Patients included<br>(N = 181) | Patients not included<br>(N = 1050) | P value |
|--------------------------------------|--------------------------------|-------------------------------------|---------|
| Age (years)                          | 81.0 [75.0, 85.0]              | 83.0 [77.0, 87.0]                   | <0.01   |
| Male sex                             | 86 (47.5)                      | 465 (44.3)                          | 0.47    |
| Body mass index (kg/m <sup>2</sup> ) | 21.5 [19.3, 24.3]              | 21.4 [18.9, 24.3]                   | 0.71    |
| NYHA ≥ II                            | 116 (64.1)                     | 658 (64.0)                          | >0.99   |
| Clinical frailty scale ≥ 5           | 32 (17.7)                      | 348 (33.2)                          | <0.01   |
| Smoking history                      | 75 (41.7)                      | 385 (37.3)                          | 0.30    |
| Systolic blood pressure              | 126.0 [112.0, 136.0]           | 117.0 [105.0, 129.0]                | <0.01   |
| Heart rate                           | 70.0 [60.0, 76.0]              | 70.0 [61.0, 80.0]                   | 0.39    |
| <b>Past medical history</b>          |                                |                                     |         |
| Atrial fibrillation                  | 70 (38.7)                      | 561 (53.4)                          | <0.01   |
| Coronary artery disease              | 35 (19.6)                      | 177 (17.1)                          | 0.48    |
| Hypertension                         | 162 (89.5)                     | 877 (83.8)                          | 0.07    |
| Diabetes mellitus                    | 67 (37.2)                      | 336 (32.2)                          | 0.22    |

|              |           |            |      |
|--------------|-----------|------------|------|
| Dyslipidemia | 87 (48.3) | 436 (41.8) | 0.12 |
| COPD         | 18 (10.1) | 70 (7.0)   | 0.20 |
| Dialysis     | 6 (3.3)   | 12 (1.1)   | 0.06 |

Medication at discharge

|                  |            |            |       |
|------------------|------------|------------|-------|
| ACE-Is/ARBs      | 90 (49.7)  | 562 (53.9) | 0.34  |
| β blockers       | 128 (70.7) | 541 (51.9) | <0.01 |
| Diuretics        | 155 (85.6) | 840 (80.5) | 0.13  |
| MRAs             | 70 (38.7)  | 415 (39.8) | 0.84  |
| SGLT2 inhibitors | 18 (9.9)   | 63 (6.1)   | 0.07  |
| Biguanides       | 7 (3.9)    | 31 (3.0)   | 0.67  |

Laboratory data

|                                   |                      |                      |       |
|-----------------------------------|----------------------|----------------------|-------|
| Albumin (g/dL)                    | 3.3 [3.1, 3.6]       | 3.4 [3.1, 3.7]       | 0.27  |
| Hemoglobin (g/dL)                 | 11.6 [10.0, 13.1]    | 11.2 [10.1, 12.6]    | 0.39  |
| Sodium (mEq/L)                    | 140.0 [138.0, 141.0] | 139.0 [137.0, 141.0] | 0.27  |
| eGFR (mL/min/1.73m <sup>2</sup> ) | 43.9 [28.1, 58.4]    | 40.9 [29.5, 53.7]    | 0.51  |
| Cholinesterase (U/L)              | 208.0 [172.0, 255.0] | 207.0 [165.0, 254.0] | 0.28  |
| C-reactive protein (mg/dL)        | 0.6 [0.2, 1.6]       | 0.2 [0.1, 0.8]       | <0.01 |
| Hemoglobin A1c                    | 6.0 [5.6, 6.5]       | 6.0 [5.6, 6.5]       | 0.70  |

|                                |                        |                        |       |
|--------------------------------|------------------------|------------------------|-------|
| LDL cholesterol                | 92.0 [73.0, 113.5]     | 91.0 [73.0, 109.0]     | 0.38  |
| NT-proBNP (pg/mL)              | 1280.0 [529.2, 2995.0] | 1058.5 [492.0, 2370.8] | 0.17  |
| Echo cardiography at discharge |                        |                        |       |
| LVDd (mm)                      | 46.4 [42.0, 51.2]      | 45.0 [41.0, 49.9]      | 0.04  |
| LVEF (%)                       | 61.0 [55.0, 65.0]      | 61.0 [55.1, 65.6]      | 0.60  |
| LAVI (mL/m <sup>2</sup> )      | 50.0 [37.0, 64.8]      | 51.0 [38.0, 67.0]      | 0.42  |
| LVMI (g/m <sup>2</sup> )       | 117.9 [98.9, 146.3]    | 99.5 [82.3, 119.6]     | <0.01 |
| TAPSE (mm)                     | 17.4 [15.1, 20.4]      | 17.3 [14.6, 20.2]      | 0.57  |
| Mean E/e'                      | 12.7 [10.0, 17.2]      | 12.4 [9.7, 16.7]       | 0.48  |
| TRPG (mmHg)                    | 25.9 [20.4, 32.0]      | 27.0 [22.0, 33.0]      | 0.02  |
| Nutritional status             |                        |                        |       |
| CONUT score                    | 3.0 [2.0, 5.0]         | 3.0 [2.0, 5.0]         | 0.57  |
| GNRI                           | 91.2 [84.5, 98.3]      | 92.0 [84.5, 99.2]      | 0.67  |
| PNI                            | 40.6 [37.4, 44.4]      | 41.1 [37.2, 44.8]      | 0.36  |

1

2    This comparison summarizes the difference between patients included and those not

3    included. Data are shown as median [interquartile range] or number (percentage).

4    Abbreviations: GDF15, Growth differentiation factor 15; NYHA, New York Heart

1 Association; COPD, chronic obstructive pulmonary disease; ACE-Is,  
2 angiotensin-converting enzyme inhibitors; ARBs, angiotensin II receptor blockers;  
3 MRAs, mineralocorticoid receptor antagonists; SGLT2 inhibitors, sodium glucose  
4 cotransporter2 inhibitors; eGFR, estimated glomerular filtration rate; LDL, low density  
5 lipoprotein; NT-proBNP, N-terminal pro-brain natriuretic peptide; LVDd, left  
6 ventricular diastolic diameter; LVEF, left ventricular ejection fraction; LAVI, left atrial  
7 volume index; LVMI, left ventricular mass index; TAPSE, tricuspid annular plane  
8 systolic excursion; E, early diastolic velocity on transmitral doppler; e', early diastolic  
9 velocity of the mitral valve annulus; TRPG, tricuspid regurgitation pressure gradient;  
10 CONUT, controlling nutritional status; GNRI, geriatric nutritional risk index; PNI,  
11 prognostic nutritional index.  
12

## Collaborators list

### The OCVC-Heart Failure Investigators

**Chair:** Yasushi Sakata, Department of Cardiovascular Medicine, Osaka University Graduate School of Medicine, 2-2 Yamada-oka, Suita 565-0871, Japan.

**Study manager:** Yohei Sotomi (Chief), Daisaku Nakatani, Katsuki Okada, Tomoharu Dohi, Akihiro Sunaga, Hirota Kida, Taiki Sato, Yuki Matsuoka, and Daisuke Sakamoto; Department of Cardiovascular Medicine, Osaka University Graduate School of Medicine, Suita, Japan.

**Collaborators:** Masahiro Seo, Tetsuya Watanabe, and Takahisa Yamada, Osaka General Medical Center, Osaka, Japan; Takaharu Hayashi and Yoshiharu Higuchi, Osaka Police Hospital, Osaka, Japan; Masaharu Masuda, Mitsutoshi Asai, and Toshiaki Mano, Kansai Rosai Hospital, Amagasaki, Japan; Hisakazu Fuji, Kobe Ekisaikai Hospital, Kobe, Japan; Shunsuke Tamaki, Daisaku Masuda, Ryu Shutta, and Shizuya Yamashita, Rinku General Medical Center, Izumisano, Japan; Masami Sairyo and Yusuke Nakagawa, Kawanichi City Medical Center, Kawanishi, Japan; Haruhiko Abe, Yasunori Ueda, and Yasushi Matsumura, National Hospital Organization Osaka National Hospital, Osaka, Japan; Kunihiro Nagai, Ikeda Municipal Hospital, Ikeda, Japan; Masamichi Yano, Masami Nishino, and Jun Tanouchi, Osaka Rosai Hospital, Sakai, Japan; Yoh Arita and, Nobuyuki Ogasawara, Japan Community Health Care Organization Osaka Hospital, Osaka, Japan; Takamaru Ishizu, Minoru Ichikawa and Yuzuru Takano, Higashiosaka City Medical Center, Higashiosaka, Japan; Eisai Rin, Kawachi General Hospital, Higashiosaka, Japan; Yukinori Shinoda, Koichi Tachibana and Shiro Hoshida, Yao Municipal Hospital, Yao, Japan; Masahiro Izumi, Kinki Central Hospital, Itami, Japan; Hiroyoshi Yamamoto and Hiroyasu Kato, Japan Community Health Care Organization, Osaka Minato Central Hospital, Osaka, Japan; Kazuhiro Nakatani and Yuji Yasuga, Sumitomo Hospital, Osaka, Japan; Mayu Nishio and Keiji Hirooka, Saiseikai Senri Hospital, Suita, Japan; Takahiro Yoshimura, Kazunori Kashiwase and Shinji Hasegawa, National Hospital Organization Osaka Minami Medical Center, Kawachinagano, Japan; Akihiro Tani, Kano General Hospital, Osaka, Japan; Yasushi Okumoto, Kinan Hospital, Tanabe, Japan; Yasunaka Makino, Hyogo Prefectural Nishinomiya Hospital, Nishinomiya, Japan; Toshinari Onishi and Katsuomi Iwakura, Sakurabashi Watanabe Hospital, Osaka, Japan; Yoshiyuki Kijima, Japan Community Health Care Organization, Hoshigaoka Medical Center, Hirakata, Japan; Takashi Kitao, Minoh City Hospital, Minoh, Japan; Masashi Fujita, Osaka International Cancer Institute, Osaka, Japan; Koichiro Harada, Suita Municipal Hospital, Suita, Japan; Masahiro Kumada and Osamu Nakagawa, Toyonaka Municipal Hospital,

1 Toyonaka, Japan; Ryo Araki and Takayuki Yamada, Otemae Hospital, Osaka, Japan;  
2 Akito Nakagawa and Yoshio Yasumura, Amagasaki Chuo Hospital, Amagasaki, Japan;  
3 and Daisuke Sakamoto, Yuki Matsuoka, Taiki Sato, Akihiro Sunaga, Hirota Kida, Yohei  
4 Sotomi, Tomoharu Dohi, Yasuhiro Akazawa, Kei Nakamoto, Katsuki Okada, Fusako Sera,  
5 Hidetaka Kioka, Tomohito Ohtani, Toshihiro Takeda, Daisaku Nakatani, Shungo Hikoso,  
6 and Yasushi Sakata, Osaka University Graduate School of Medicine, Suita, Japan.

7

8
